# Supplementary material
Source: PubMed Central journal article supplement (PMC3673547)
Supplement: NIHMS306996-supplement-01.pdf [file NIHMS306996-supplement-01.pdf]

# Recognition of HIV TAR RNA by triazole linked neomycin dimers

*Sunil Kumar, Dev P. Arya*

*Laboratory of Medicinal Chemistry, Department of Chemistry, Clemson University, Clemson, SC 29634*

## Supporting Information

### Appendices

1. Synthesis procedure .....S1
2. Characterization of neomycin dimer (DPA51) .....S2
3. Conc. dependent UV thermal denaturation data for TAR RNA with DPA52..S3

## 1. Synthesis procedure (S1).

*DPA 51.* To a solution of 5''-azide-neomycin B (62 mg, 0.05 mmol) in dry toluene (5 mL), propargyl ether (2.35 mg, 0.025 mmol, 0.50 eq) was added followed by the addition of CuI (4.76 mg, 0.025 mmol) and DIPEA (6.46 mg, 0.05 mmol). The reaction mixture stirred at 90 °C for 18 h in the atmosphere of argon. The volatiles were removed under vacuum. Purification by flash column chromatography (0 to 10 % ethanol in CH<sub>2</sub>Cl<sub>2</sub>) afforded the desired product as a white solid (57.3 mg, 89%)

*Deprotection of N-Boc protected neomycin dimers.* To a solution of neomycin dimer (30 mg) in dioxane (3 mL), 4 M HCl/dioxane (1 mL) was added and the reaction started at room temperature. A white precipitate formed after 15 min. The reaction mixture was centrifuged and the solid was collected. The solid was washed with a solution of diethyl ether/hexane [3 × 5 mL each, 1:1 (v/v)]. The solid was then dissolved in water and lyophilized to afford a white solid (16.9 mg, 95%). <sup>1</sup>H NMR (500 MHz, D<sub>2</sub>O): δ 8.02 (s, 2 H, triazole), 5.92 (d, *J* = 3.94 Hz, 2 H, H<sub>1II</sub>), 5.28 (d, *J* = 3.16 Hz, 2 H, H<sub>1III</sub>), 5.17 (s, 2 H, H<sub>1IV</sub>), 4.41 (m, 2 H, H<sub>4III</sub>), 4.34 (d, *J* = 5.20 Hz, 2 H, H<sub>2III</sub>), 4.18 (d, *J* = 4.73 Hz, 2 H, H<sub>4IV</sub>), 4.10 (d, *J* = 2.84 Hz, 2 H, H<sub>4I</sub>), 3.96 (t, *J* = 9.62 Hz, 2 H, H<sub>6II</sub>), 3.90 (t, *J* = 9.93 Hz, 2 H, H<sub>5I</sub>), 3.76-3.86 (m, 8 H, H<sub>2IV</sub>, H<sub>4II</sub>, H<sub>5IV</sub>, and H<sub>3III</sub>), 3.70 (d, *J* = 1.89 Hz, 2 H, H<sub>6I</sub>), 3.54 (t, *J* = 9.61 Hz, 2 H, H<sub>3II</sub>), 3.45-3.49 (m, 4 H, H<sub>3I</sub>, H<sub>5II</sub>), 3.32-3.44 (m, 2 H, H<sub>1I</sub>), 3.20-3.30 (m, 8 H, H<sub>5III</sub> and propargyl ether protons), 2.32-2.39 (dt, *J*<sub>1</sub> = 3.63 Hz, *J*<sub>2</sub> = 4.57 Hz, 2 H, H<sub>2Ieq.</sub>), 1.72-1.82 (q, *J* = 12.45 Hz, 2 H, H<sub>2Iax.</sub>); MS MALDI-TOF *m/z* for C<sub>52</sub>H<sub>96</sub>N<sub>18</sub>O<sub>25</sub> [M+H<sub>2</sub>O]<sup>+</sup>, calcd 1391.44, found 1392.66.

2. Characterization of DPA51 (S2).

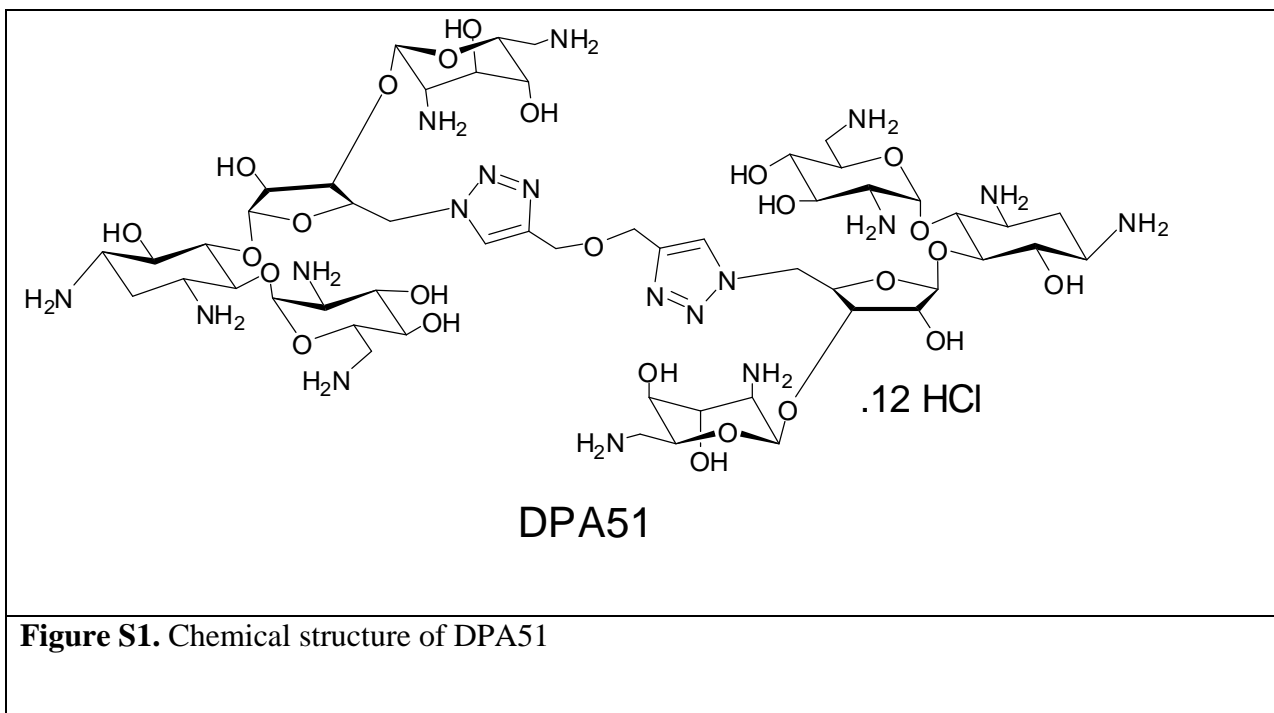

**Figure S1.** Chemical structure of DPA51

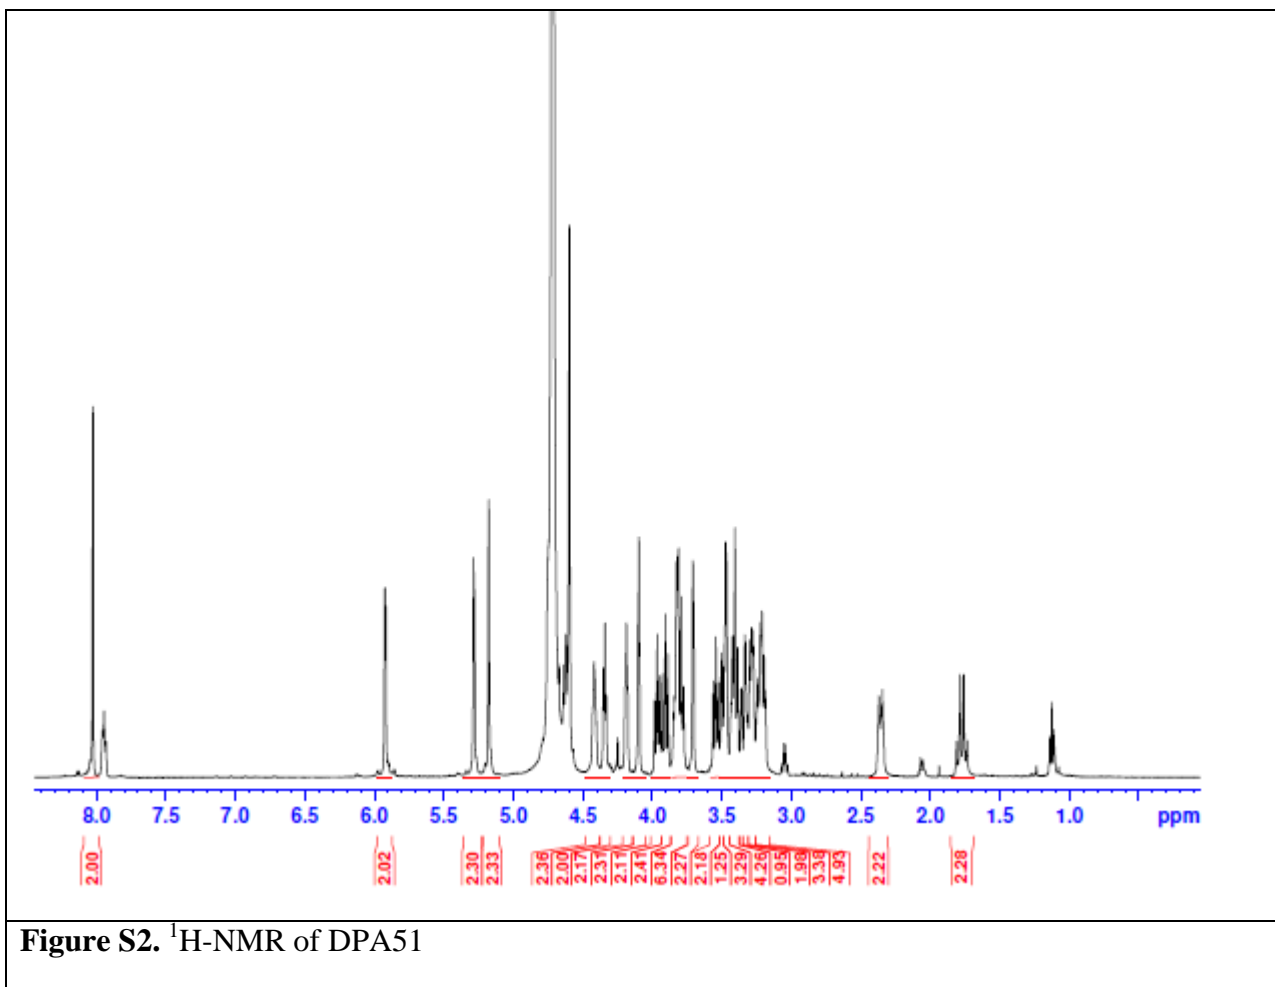

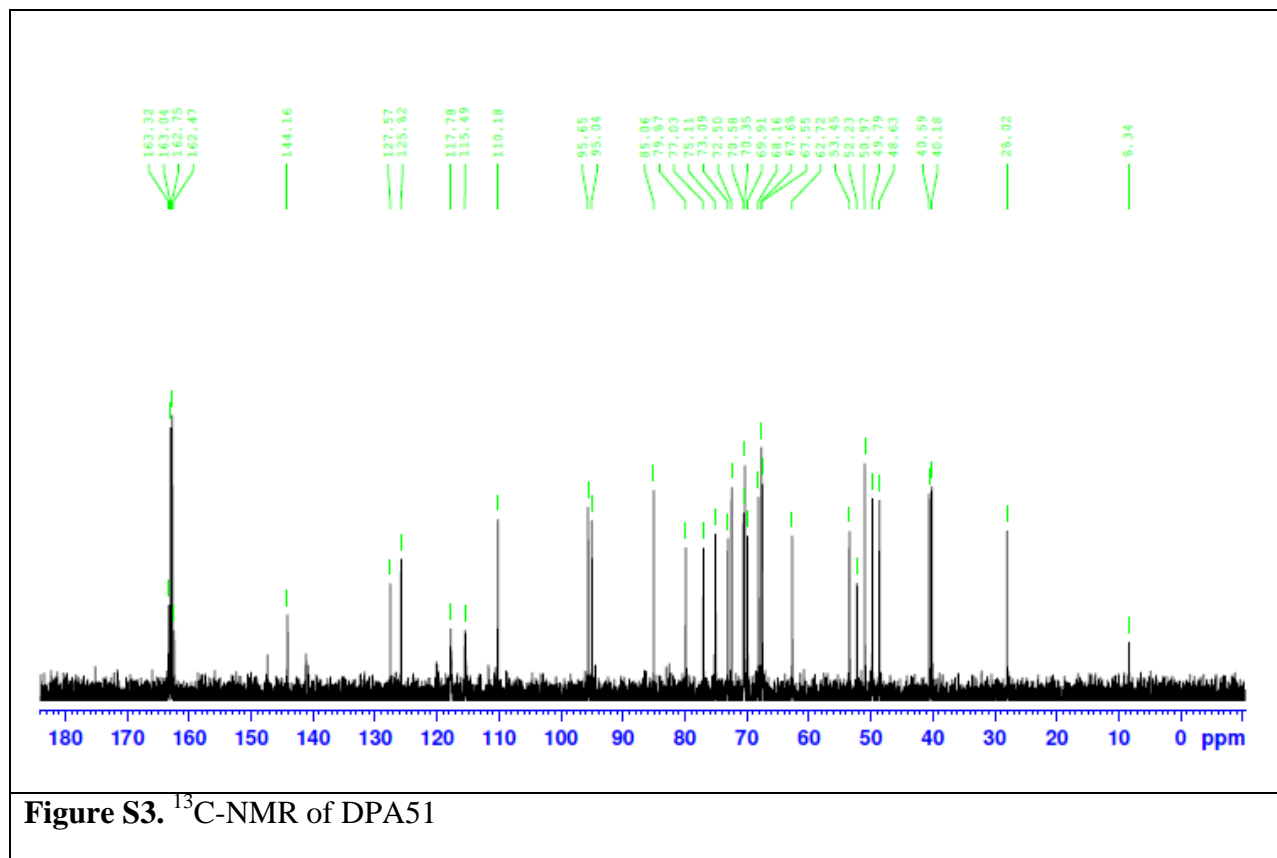

**Figure S3.**  $^{13}\text{C}$ -NMR of DPA51

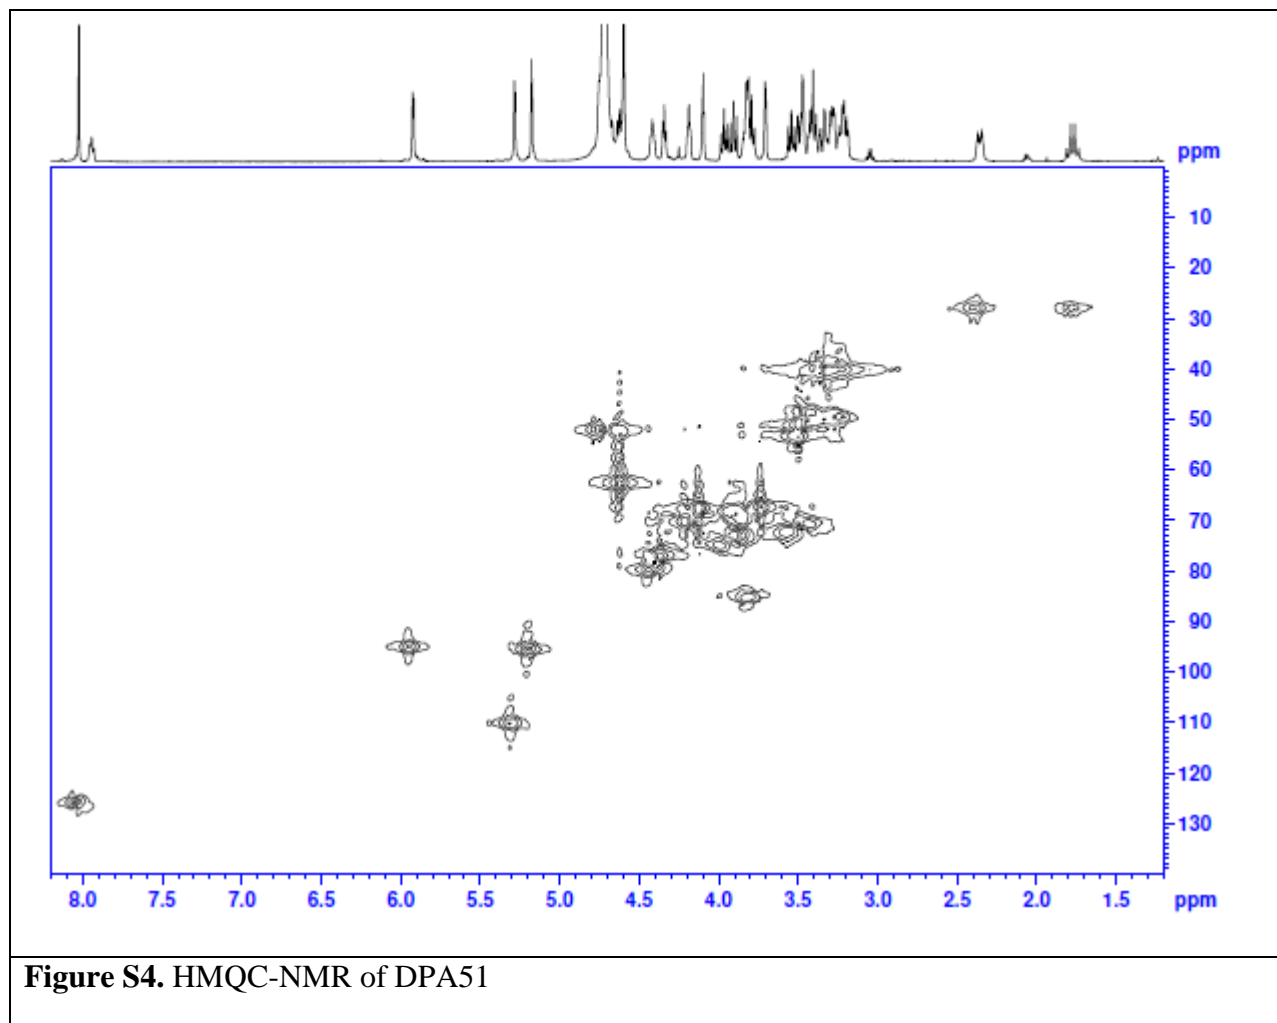

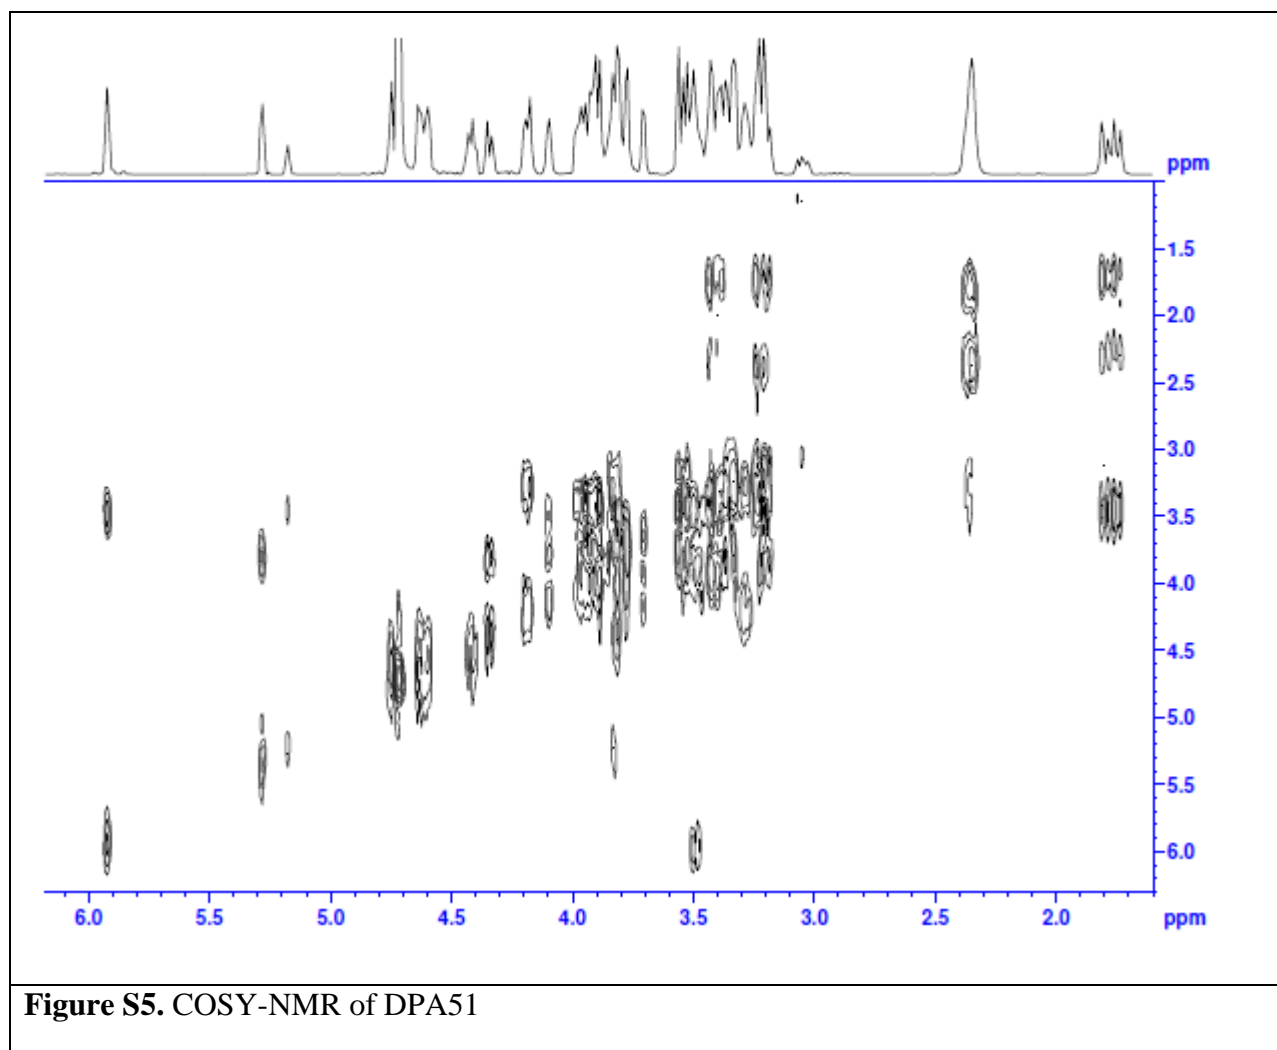

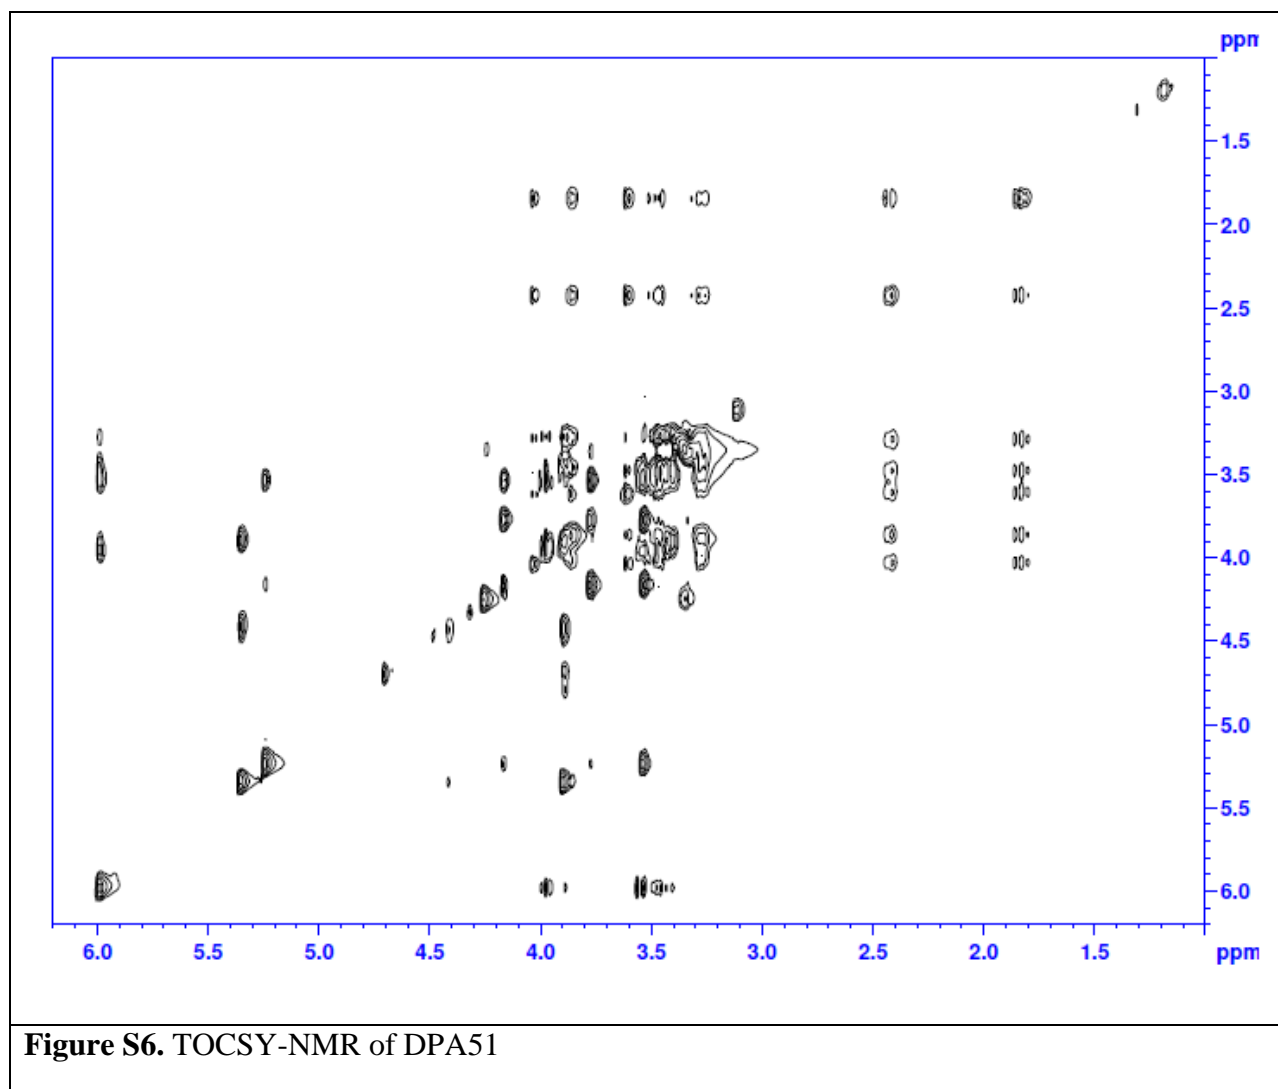

**Figure S6.** TOCSY-NMR of DPA51



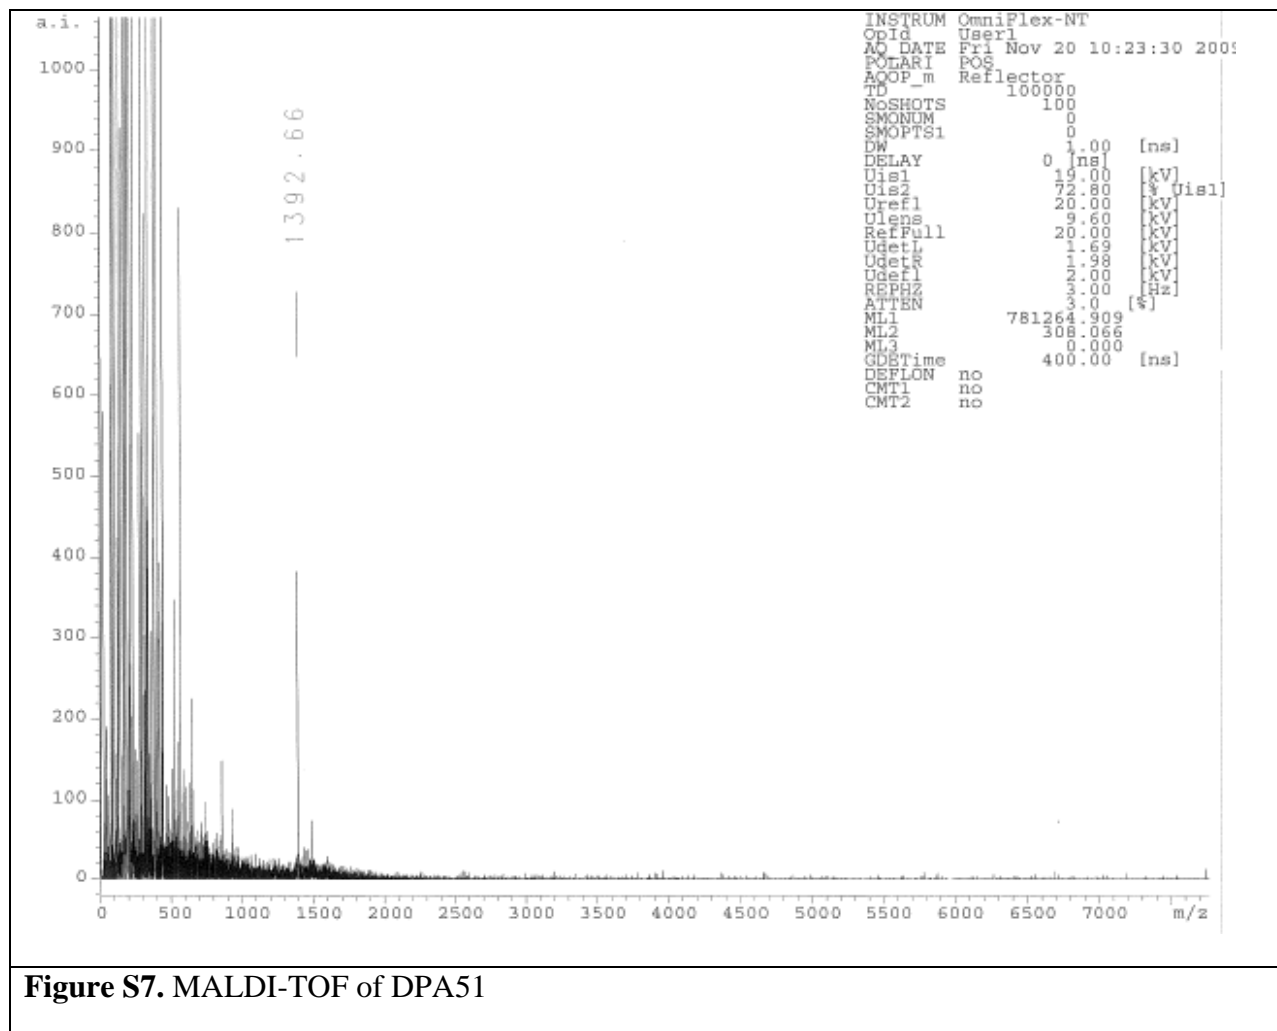

**Figure S7.** MALDI-TOF of DPA51

### 3. Conc. dependent UV thermal denaturation data for TAR RNA with DPA52

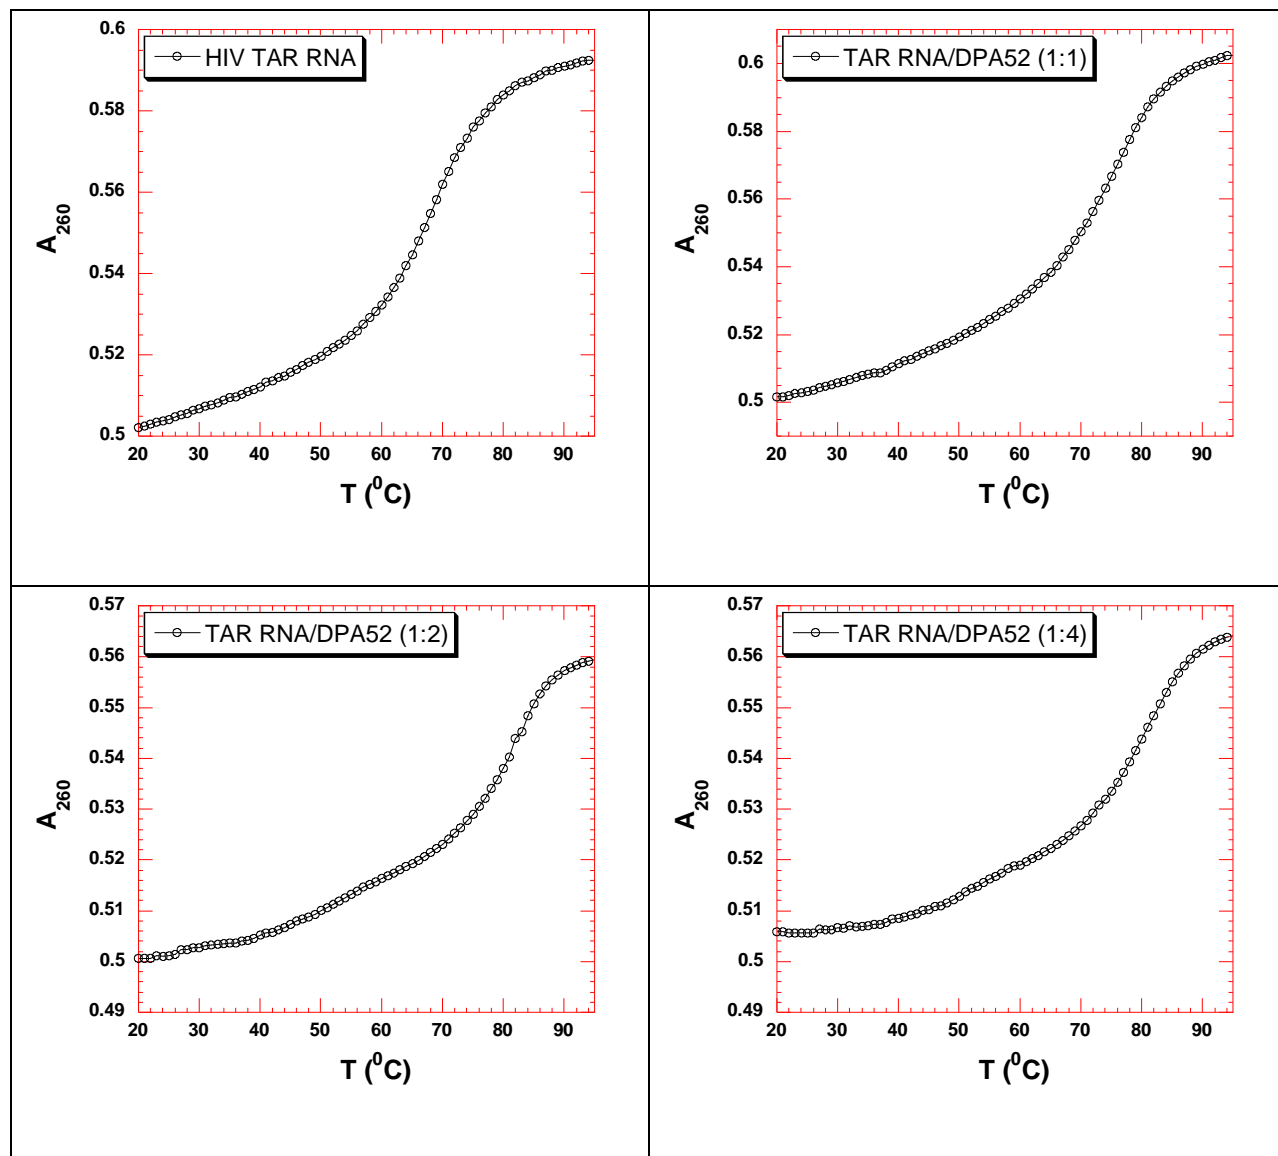

**Figure S8.** Conc. dependent UV thermal denaturation profile of HIV-1 TAR RNA with neomycin dimer. UV thermal denaturation data of HIV-1 TAR RNA at (A) 0, (B) 1  $\mu\text{M}$  (1 mol. eq.), (C) 2  $\mu\text{M}$  (2 mol. eq.), and (D) 4  $\mu\text{M}$  (4 mol. eq.). Buffer conditions: 100 mM KCl, 10 mM SC, 0.5 mM EDTA, pH 6.8. HIV TAR RNA = 1  $\mu\text{M}$ /strand. The heating rate was 0.3  $^{\circ}\text{C}$ .

| Ratio (DPA52/TAR RNA) | $T_m$ (°C) | $\Delta T_m$ (°C) |
|-----------------------|------------|-------------------|
| TAR RNA               | 68.9       | -                 |
| 1                     | 78.2       | 9.3               |
| 2                     | 80.4       | 11.5              |
| 4                     | 81.3       | 12.4              |

**Table S1.** UV thermal denaturation data of HIV TAR RNA in the presence of increasing conc. of neomycin dimer (DPA52). Buffer conditions: 100 mM KCl, 10 mM SC, 0.5 mM EDTA, pH 6.8. HIV TAR RNA = 1  $\mu$ M/strand. The heating rate was 0.3 °C.
